# Supplementary figures and images for: Strength development according with age and position: a 10-year study of 570 soccer players
Source: HighWire-hosted journal article supplement (doi:10.1136/bmjsem-2020-000927), 2021-03-01

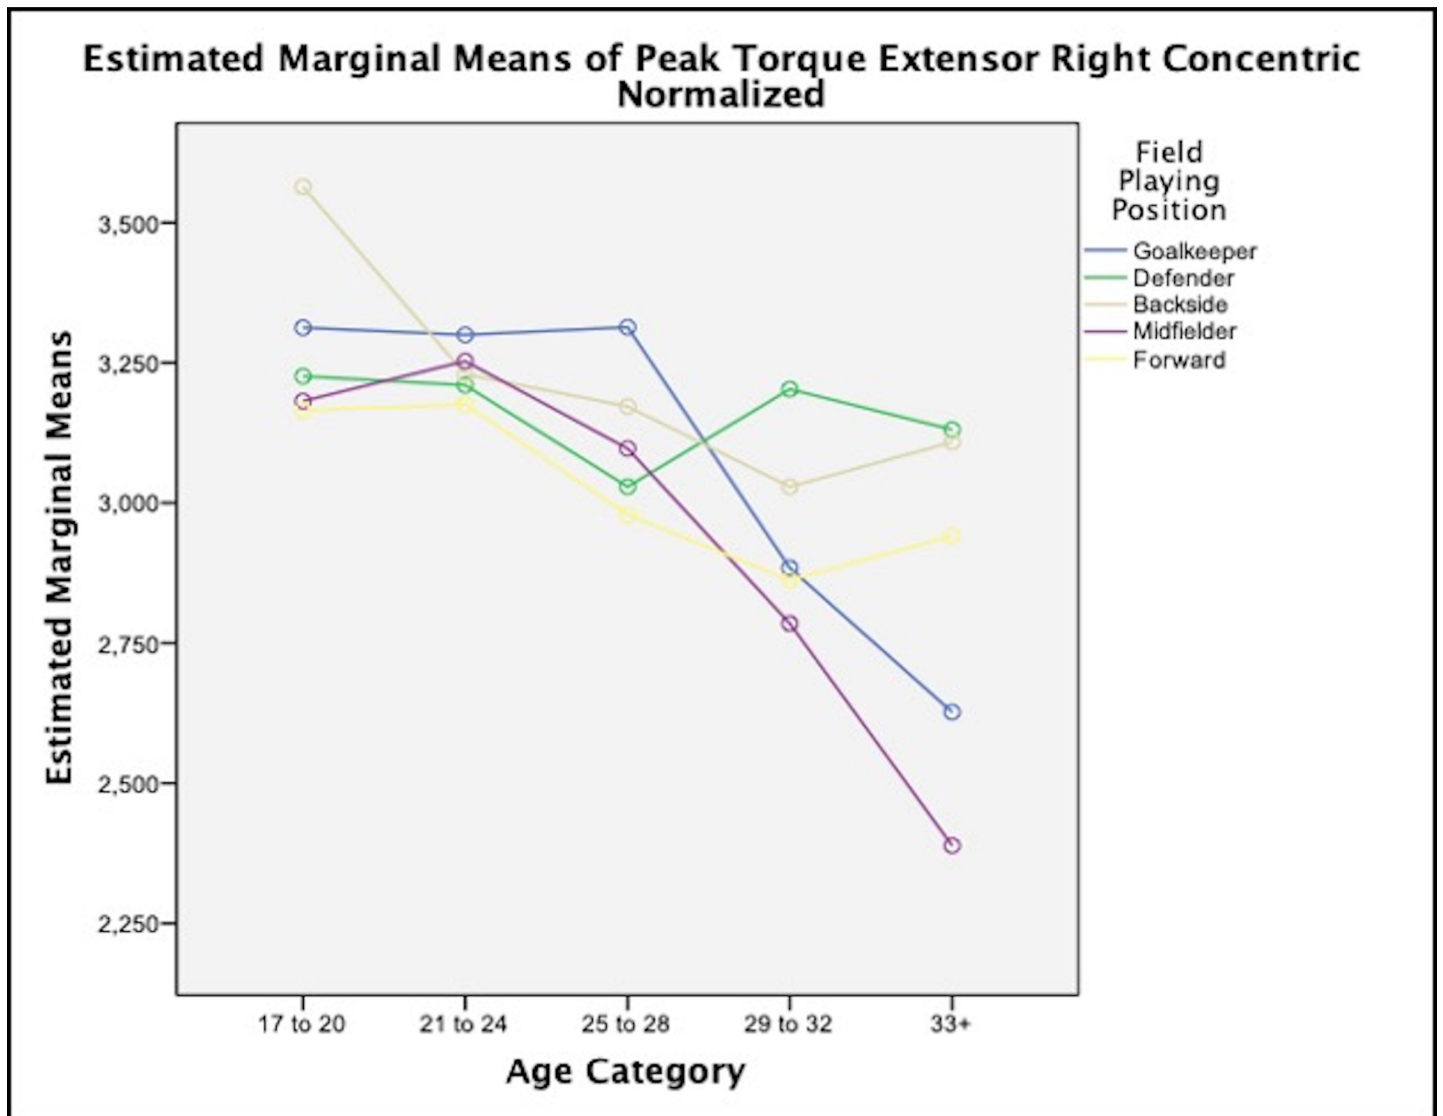

Supplement: bmjsem-2020-000927supp001_data_supplement.pdf [file bmjsem-2020-000927supp001_data_supplement.pdf]

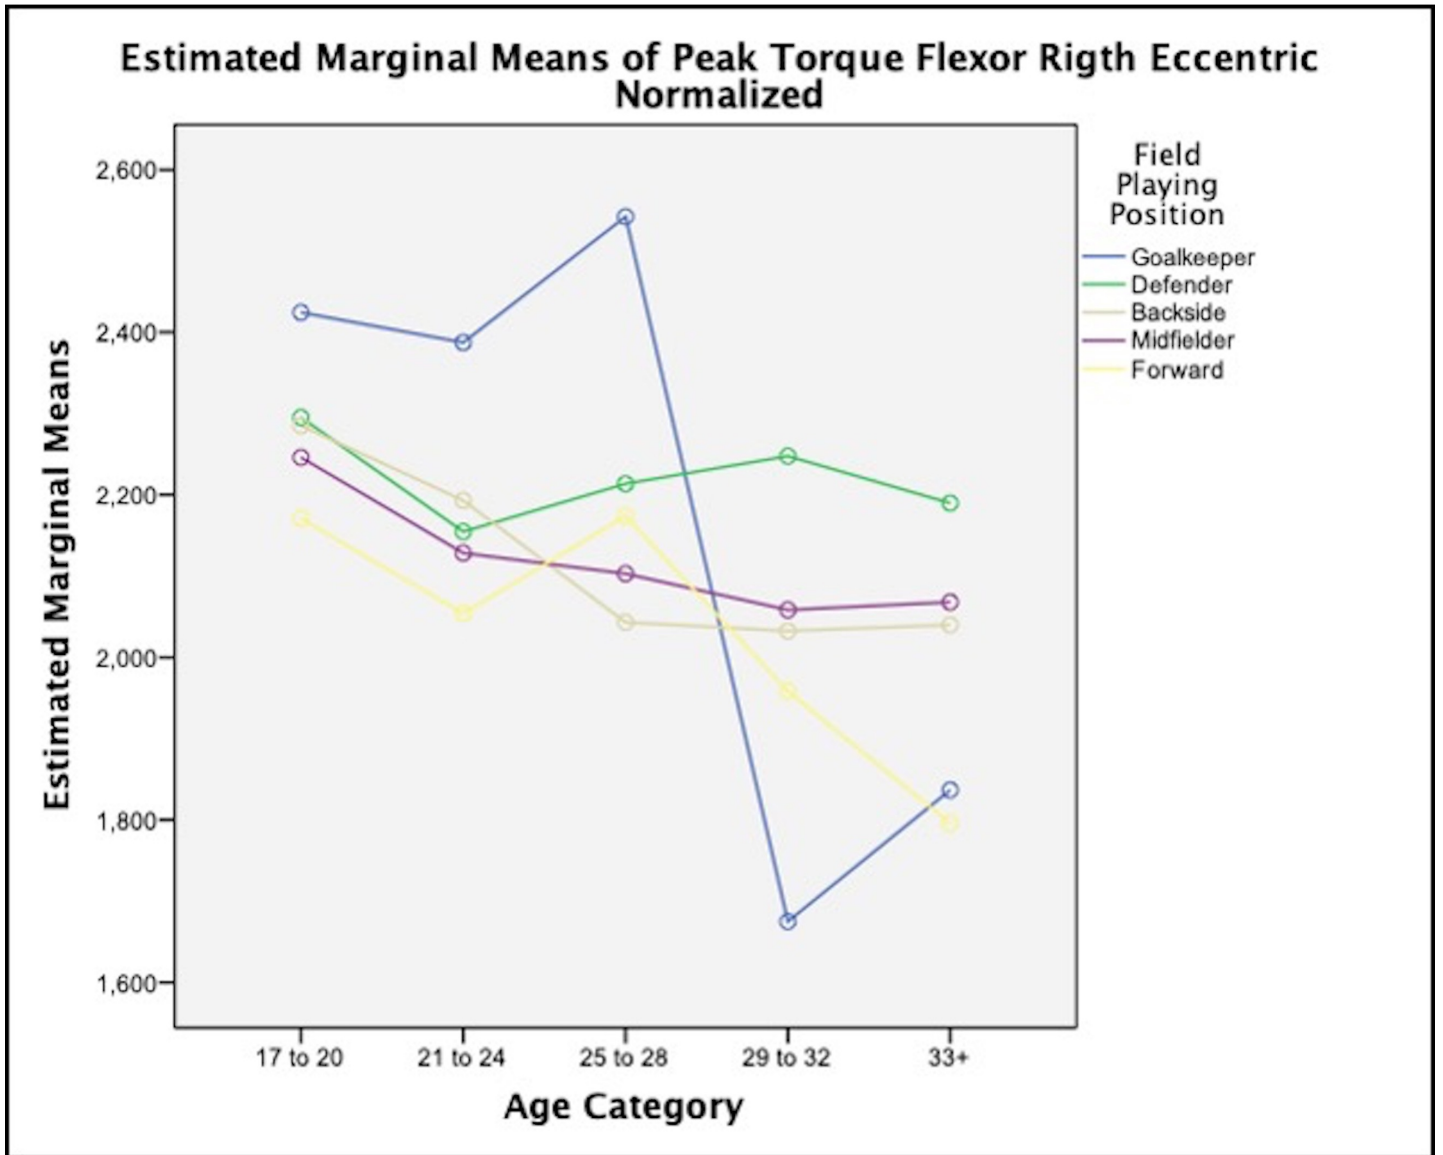

Supplement: bmjsem-2020-000927supp002_data_supplement.pdf [file bmjsem-2020-000927supp002_data_supplement.pdf]
